# Supplementary material
Source: Springer Nature journal article supplement (https://www.springermedizin.de/resource/supplementary/12885_2010_2874_MOESM5_ESM.pdf/9462200)

### BHY – 12 hours Migrating cells

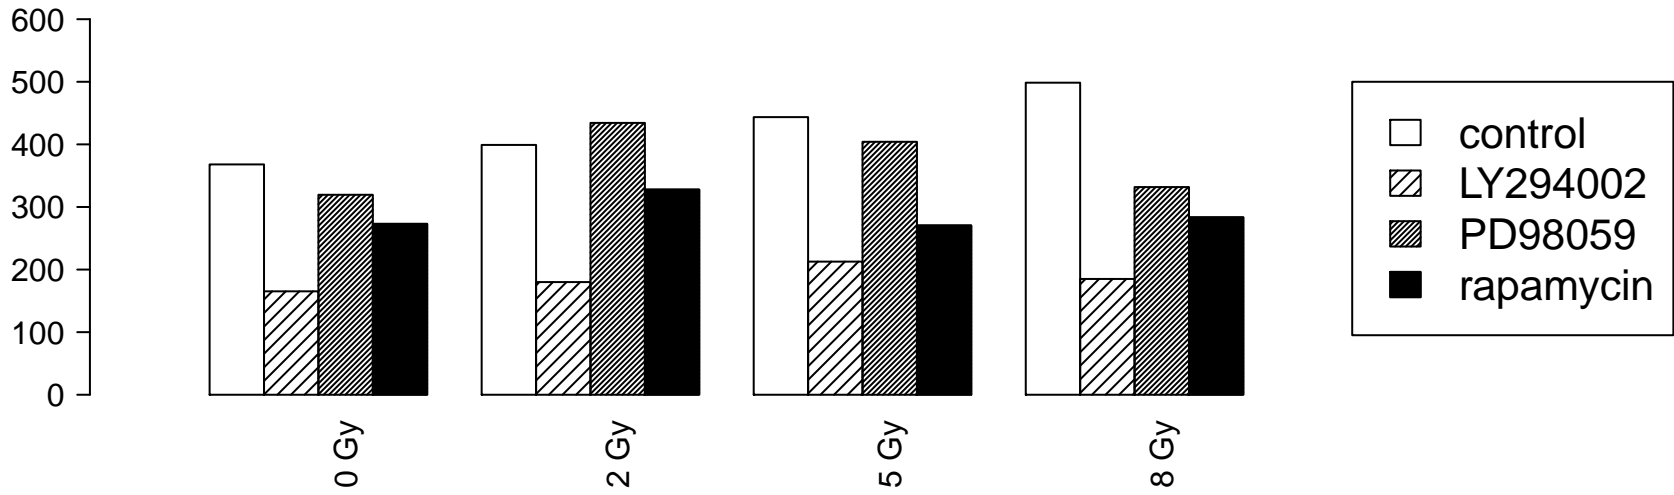

### CAL-27 – 12 hrs Migrating cells

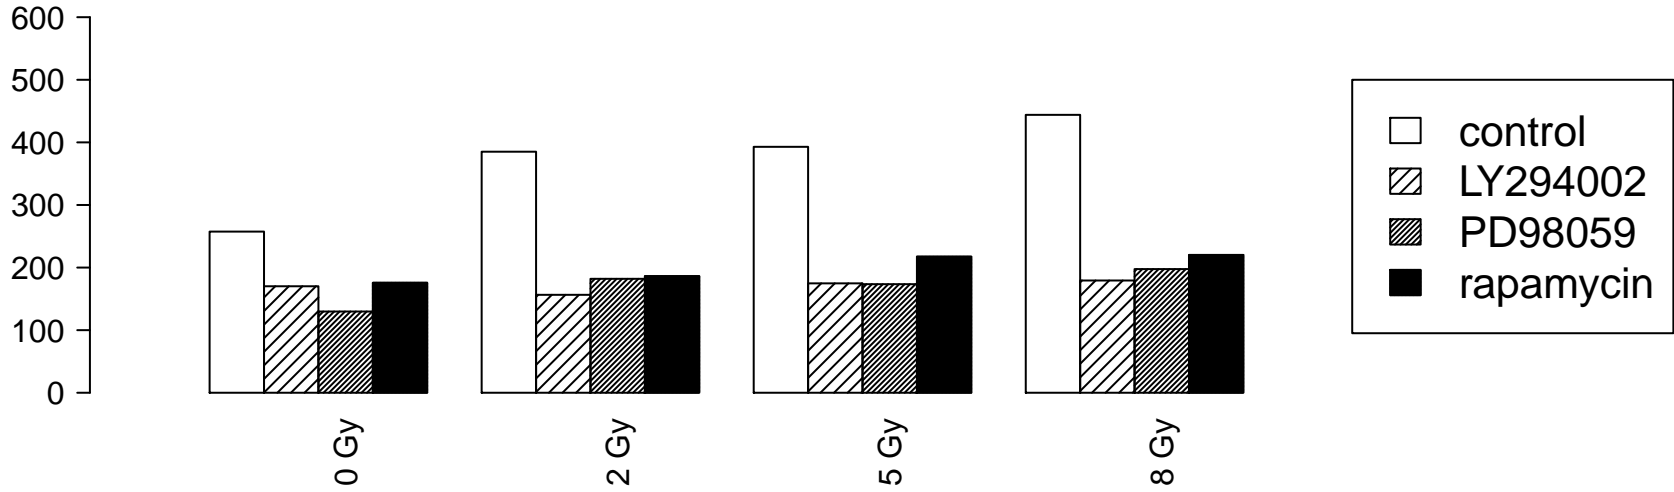

### HN – 12 hrs Migrating cells

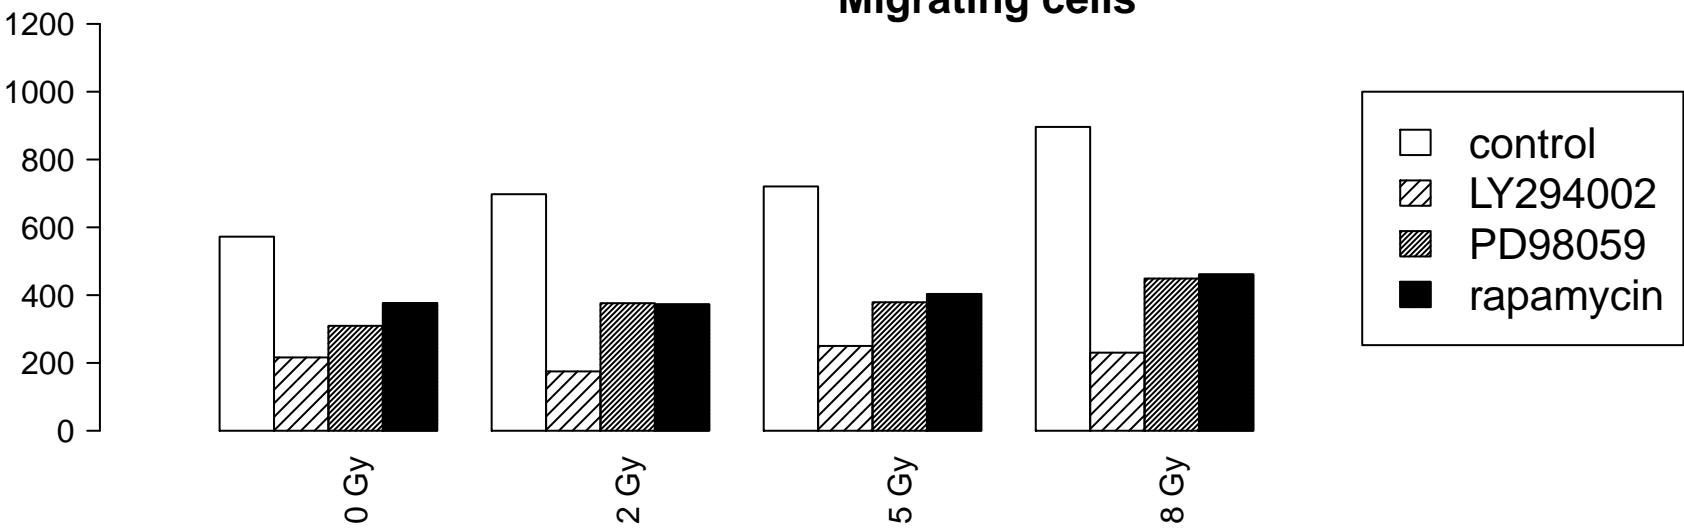

Supplement: MOESM5 [file 9462200]
